# Supplementary material
Source: Research Square preprint supplement (doi:10.21203/rs.3.rs-9163595/v1)
Supplement: Supplementary file 1 [file 6cb8f4294065a62f500cfcf5.docx]

**Supplementary Information: Evaluating spatiotemporal patterns of transmission to demonstrate malaria elimination: a case study from Bhutan**

**Figure S1.** Likelihood of two cases being within the same transmission chain based on timing of notification (x-axis) and geographical distance (y axis), with scenarios including δ values of a.) 0.1, b.) 0.05, c.) 0.01


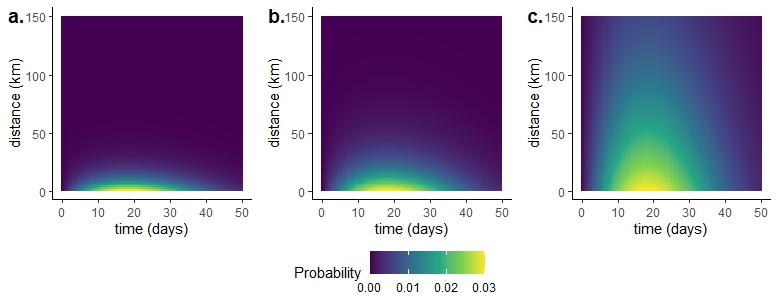


**Figure S2.** Seasonal patterns of malaria cases reported per month


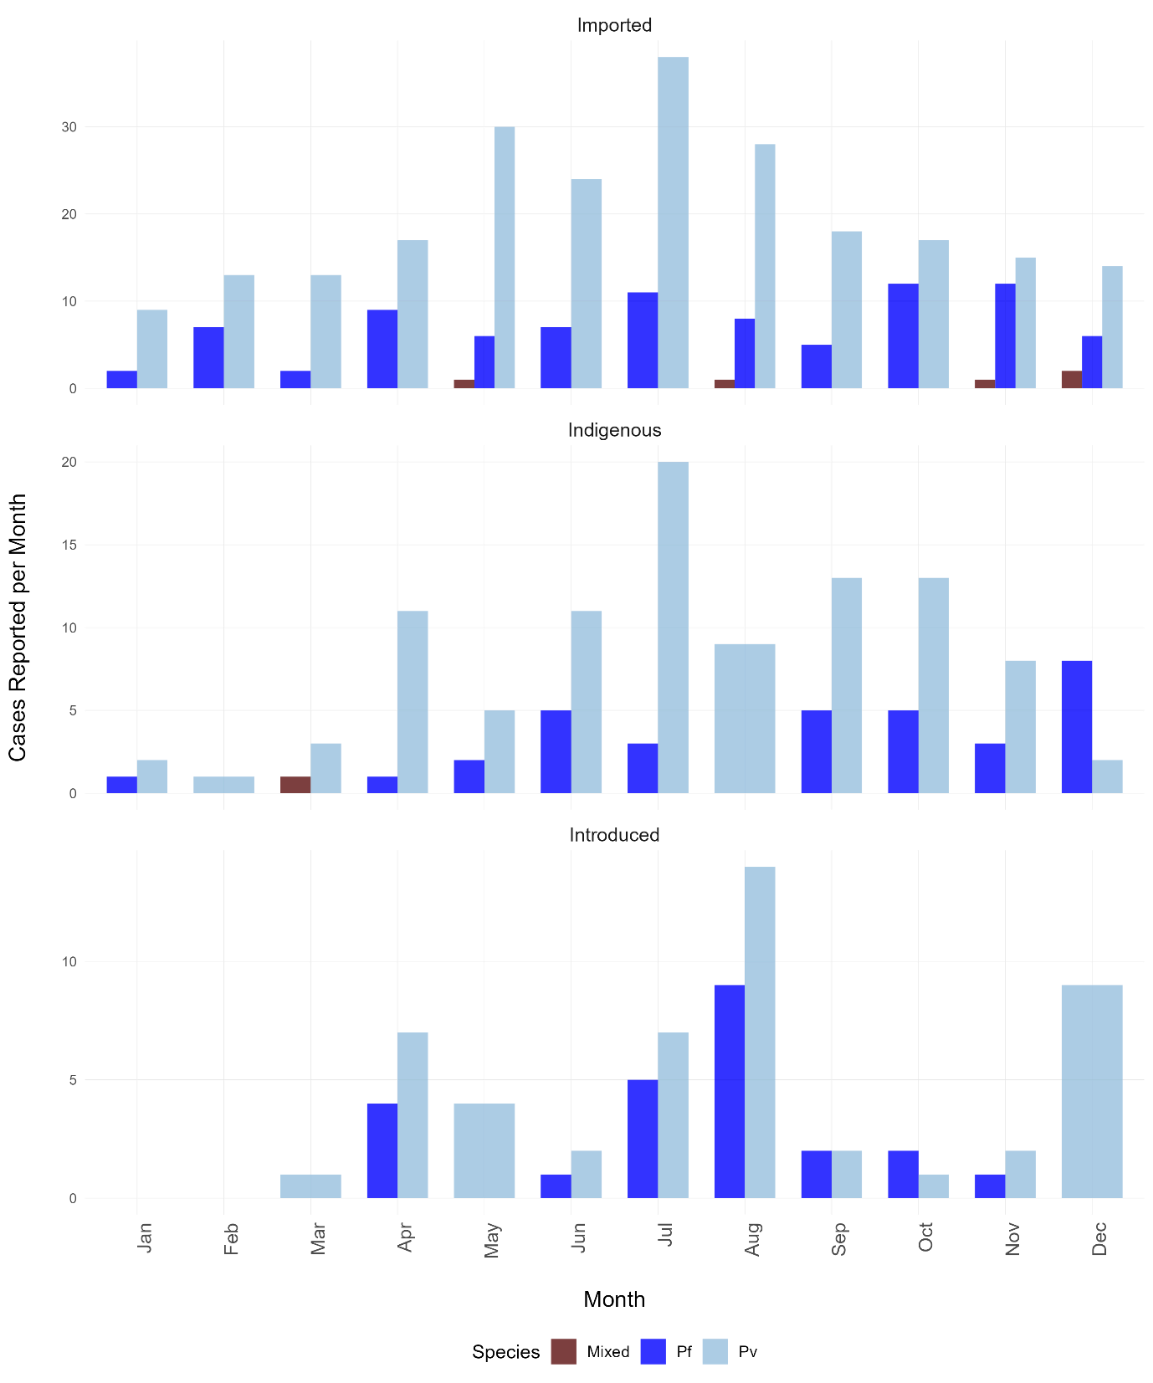


**Figure S3.** Estimated *RC* values for all scenarios assessed for a.) *P. falciparum* and b.) *P. vivax*


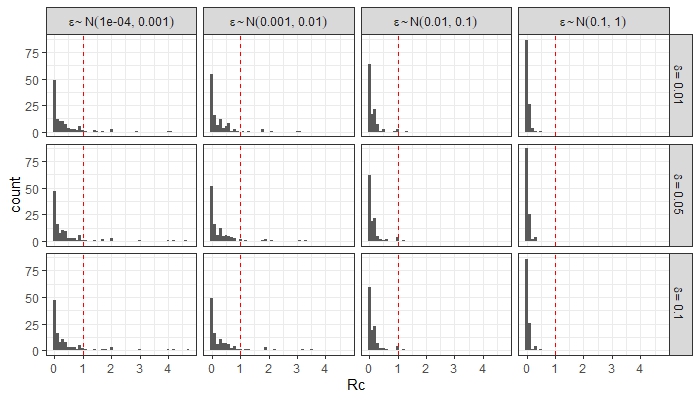


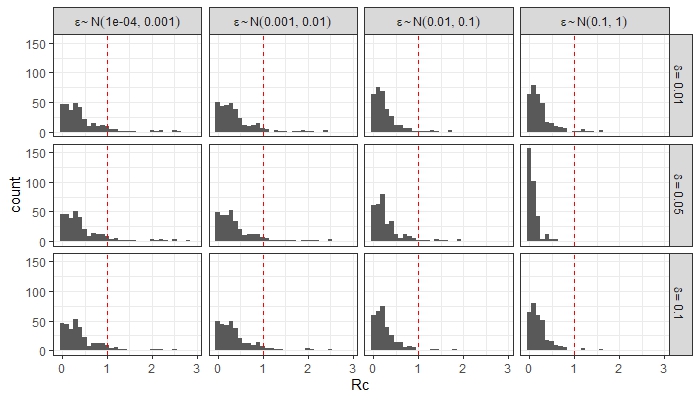


**Figure S4.** Posterior median and lower and upper limits of 95% credible intervals for predicted spatial intensity


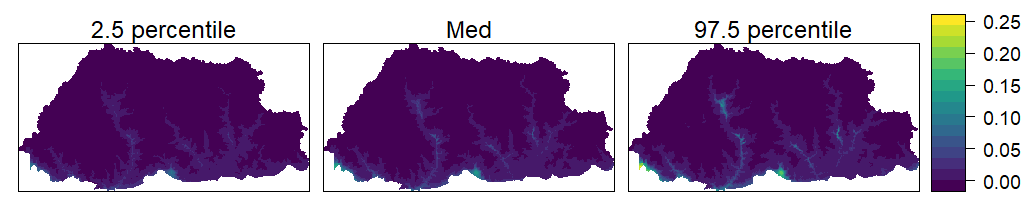


**Table S1.** Reported occupations of malaria cases

|  | **Species** | **Occupation** | **N (%)** |
| --- | --- | --- | --- |
|  | Overall | Labourer | 184 (34.5%) |
|  |  | Farmer | 173 (32.5%) |
|  |  | Student/Trainee | 61 (11.4%) |
|  |  | Government/Military | 39 (7.3%) |
|  |  | Dependent/Unemployed | 29 (5.4%) |
|  |  |  |  |
|  | *P. falciparum* | Farmer | 50 (34.7%) |
|  |  | Labourer | 43 (29.9%) |
|  |  | Government/Military | 16 (11.1%) |
|  |  | Student/Trainee | 14 (9.7%) |
|  |  | Dependent/Unemployed | 7 (4.9%) |
|  |  |  |  |
|  | *P. vivax* | Labourer | 136 (35.4%) |
|  |  | Farmer | 123 (32%) |
|  |  | Student/Trainee | 47 (12.2%) |
|  |  | Dependent/Unemployed | 23 (6%) |
|  |  | Government/Military | 22 (5.7%) |
|  |  |  |  |
|  | Mixed | Labourer | 5 (83.3%) |
|  |  | Farmer | 1 (16.7%) |

**Table S2.** Parameter and dataset combinations with model fit statistics

| **Model** | **DIC** |
| --- | --- |
| Spatial random effect only | 1125 |
| Elevation | 1084 |
| Temperature | 1048 |
| Precipitation | 1216 |
| Distance from hydropower plant | 1465 |
| Distance from India border | 1332 |
| All covariates (except spatial) | 1009 |

**Table S3.** Posterior fixed effect estimates for final multivariate model

| **Variable** | **2.5%** | **Median** | **97.5%** |
| --- | --- | --- | --- |
| Elevation | 0.001 | 0.003 | 0.005 |
| Temperature | 0.000 | 0.000 | 0.001 |
| Precipitation | 0.983 | 1.425 | 1.86 |
| Distance to hydropower plant | 0.029 | 0.046 | 0.063 |
| Distance to India border | -0.003 | 0.007 | 0.018 |
